# Supplementary material for: Relaxation Response Induces Temporal Transcriptome Changes in Energy Metabolism, Insulin Secretion and Inflammatory Pathways
Source: PLOS journal article supplement (doi:10.1371/journal.pone.0062817), 2013-05-01
Supplement: S1 (10.1371/journal.pone.0062817.s001) [file journal.pone.0062817.s001]

**Novices (N1)****Short-Term Practitioners (N2)****Long-Term Practitioners (M)****Pre-Visit (Week 0)****Post-Visit (Week 8)**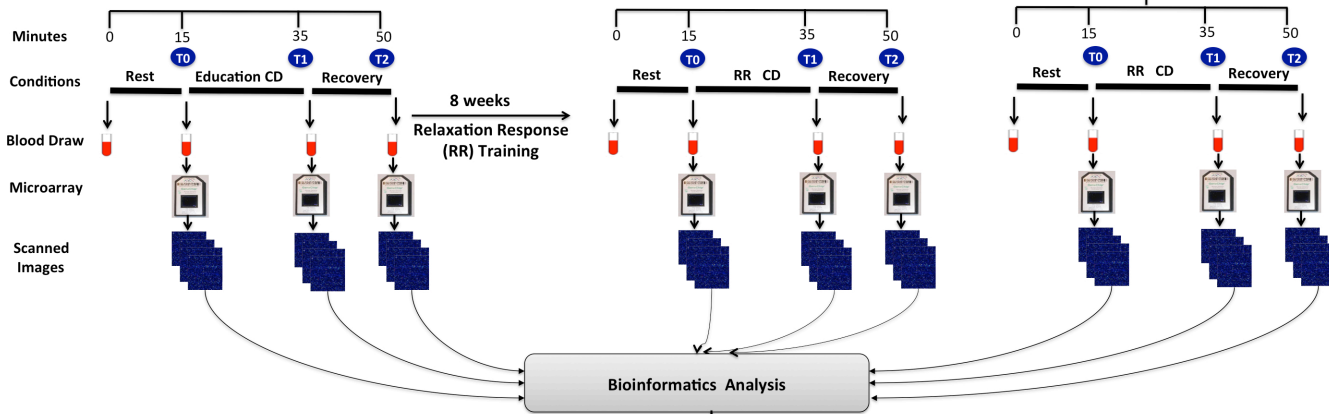

Individual Gene Analysis

Self-Organizing Map  
Pattern AnalysisGene Ontology/  
Pathway AnalysisGene Set Enrichment  
Analysis

Pattern Analysis

Interactive Network  
AnalysisNetwork of RR &  
Focus Gene HubsPathways  
database
