# Supplementary material for: Relaxation Response Induces Temporal Transcriptome Changes in Energy Metabolism, Insulin Secretion and Inflammatory Pathways
Source: PLOS journal article supplement (doi:10.1371/journal.pone.0062817), 2013-05-01
Supplement: S7 (10.1371/journal.pone.0062817.s007) [file journal.pone.0062817.s007]

**Table S1:** Gene-ontology enrichment analysis of progressive and long-term expression patterns.

| <b>Progressive Upregulated</b>                                                            | <b>Enrichment Score</b> | <b>Related Processes</b>                                    |
|-------------------------------------------------------------------------------------------|-------------------------|-------------------------------------------------------------|
| System Development                                                                        | 10.6                    | Nervous System Development                                  |
| Cell Differentiation                                                                      | 5.9                     | Regulation Of Cell Proliferation                            |
| Protein Binding                                                                           | 5.7                     |                                                             |
| Transmission Of Nerve Impulse                                                             | 5.2                     |                                                             |
| Cell Adhesion And Communication                                                           | 4.46                    |                                                             |
| Regulation Of Transcription From RNA Polymerase II Promote                                | 4.2                     |                                                             |
| Muscle Contraction                                                                        | 4.05                    |                                                             |
| Blood Vessel Morphogenesis                                                                | 3.8                     | Vasculature Development                                     |
| Steroid Hormone Receptor Activity                                                         | 3.5                     |                                                             |
| Gland Development                                                                         | 3.72                    |                                                             |
| Regulation Of Transport                                                                   | 3.36                    |                                                             |
| Positive Regulation Of Transcription, DNA-Dependent                                       | 3.25                    | Regulation Of Transcription From RNA Polymerase II Promoter |
| Glial Cell Differentiation                                                                | 3.06                    |                                                             |
| Regulation Of Growth                                                                      | 3                       |                                                             |
| Response To Steroid Hormone Stimulus                                                      | 2.8                     |                                                             |
| Positive Regulation Of Phospholipase C Activity                                           | 2.8                     |                                                             |
| Response To Vitamin                                                                       | 2.77                    |                                                             |
| Second-Messenger-Mediated Signaling                                                       | 2.7                     | Regulation Of Camp Metabolic Process                        |
| Regulation Of Systemic Arterial Blood Pressure                                            | 2.4                     |                                                             |
| Oxidoreductase Activity                                                                   | 2.23                    |                                                             |
| Response To Oxygen Levels                                                                 | 2.23                    |                                                             |
| <b>Progressive Downregulated</b>                                                          |                         |                                                             |
| mrna Processing                                                                           | 2.14                    |                                                             |
| Intracellular Protein Transport                                                           | 2                       |                                                             |
| Antigen Processing And Presentation Of Peptide Or Polysaccharide Antigen Via MHC Class II | 1.6                     |                                                             |
| Immune System Development                                                                 | 1.5                     |                                                             |
| Primary Metabolic Process                                                                 | 1.5                     |                                                             |
| Regulation Of DNA Binding                                                                 | 1.5                     |                                                             |
| Apoptosis                                                                                 | 1.36                    |                                                             |

| <b>Long-Term Upregulated</b>                  |      |                                                                  |
|-----------------------------------------------|------|------------------------------------------------------------------|
| Protein Binding                               | 5.7  |                                                                  |
| Glutamine Family Amino Acid Catabolic Process | 2.6  |                                                                  |
| Cellular Component Organization               | 2.6  |                                                                  |
| Cell-Matrix Adhesion                          | 2.26 |                                                                  |
| Transcription Regulator Activity              | 2.15 |                                                                  |
| Regulation Of Neuronal Synaptic Plasticity    | 2.15 |                                                                  |
| Multicellular Organismal Response To Stress   | 2    |                                                                  |
| Cell Communication                            | 2    |                                                                  |
| Cell Death                                    | 1.96 |                                                                  |
| Muscle Cell Differentiation                   | 1.94 |                                                                  |
| Regulation Of Cytoskeleton Organization       | 1.79 |                                                                  |
| Nervous System Development                    | 1.77 |                                                                  |
| Membrane Organization                         | 1.67 |                                                                  |
| Transcription Repressor Activity              | 1.6  |                                                                  |
| Amine Transport                               | 1.54 |                                                                  |
| ATPase Activity                               | 1.53 |                                                                  |
| Ubiquitin Cycle                               | 1.51 |                                                                  |
| <b>Long-Term Downregulated</b>                |      |                                                                  |
| Protein Binding                               | 11.3 |                                                                  |
| Regulation Of Apoptosis                       | 3.8  | Cell Death, Apoptosis                                            |
| Nuclear Transport                             | 3.6  | Protein, Macromolecule Transport                                 |
| mrna Processing                               | 2.8  |                                                                  |
| Cellular Metabolic Process                    | 2.7  |                                                                  |
| Positive Regulation Of Cellular Process       | 2.4  |                                                                  |
| JAK-STAT Cascade                              | 2.3  |                                                                  |
| T Cell Activation                             | 2.1  | Lymphocyte Activation,Leukocyte Activation,Immune System Process |
| Response To Insulin Stimulus                  | 2.1  | Regulation Of Glucose Transport                                  |
| Cell Cycle                                    | 2    | Cell Division,Cell Cycle Process,M Phase Of Mitotic Cell Cycle   |
| Regulation Of DNA Binding                     | 2    | Negative Regulation Of NF-Kappab Transcription Factor Activity   |
| Response To Stress                            | 2    |                                                                  |
