# Supplementary material for: Relaxation Response Induces Temporal Transcriptome Changes in Energy Metabolism, Insulin Secretion and Inflammatory Pathways
Source: PLOS journal article supplement (doi:10.1371/journal.pone.0062817), 2013-05-01
Supplement: S8 (10.1371/journal.pone.0062817.s008) [file journal.pone.0062817.s008]

| Groups | ENO Levels     |                 |               |
|--------|----------------|-----------------|---------------|
|        | T1-T0          | T2-T1           | T2-T0         |
|        | Mean (SE)      | Mean (SE)       | Mean (SE)     |
| M      | 1.93** (0.58)  | 0.07 (0.56)     | 2.18** (0.74) |
| N2     | 3.24*** (0.84) | -3.15*** (0.71) | -0.41 (0.72)  |
| N1     | 1.52 (0.79)    | -1.36** (0.49)  | 0.11 (0.89)   |

P value of paired-test for comparing ENO level between two time points within each study group: \*\* P <0.01; \*\*\* P <0.001
