# Supplementary material for: Relaxation Response Induces Temporal Transcriptome Changes in Energy Metabolism, Insulin Secretion and Inflammatory Pathways
Source: PLoS One. 2013 May 1;8(5):e62817. doi: 10.1371/journal.pone.0062817 (PMC3641112; doi:10.1371/journal.pone.0062817)
Supplement: Table S3 — Correlation analysis of NO levels and Selected 10 pathways affected progressively or only in long term manner by RR (Bold). The correlation analysis was performed both by comparing FeNO and gene expression levels at particular time point (e.g. T0, T1, T2) as well as changes in gene expression and FeNO levels within a group. The significance of the correlation was determined on the basis of P value (P<0.05) and FDR (<25%). The positive and negative correlations between FeNO and gene expression levels are indicated by red and green color respectively. (PDF) [file pone.0062817.s009.pdf]

**Table S3:** Correlation analysis of NO levels and Selected 10 pathways affected progressively or only in long term manner by RR (Bold).

The correlation analysis was performed both by comparing FeNO and gene expression levels at particular time point (e.g. T0, T1, T2) as well as changes in gene expression and FeNO levels within a group. The significance of the correlation was determined on the basis of P value ( $P < 0.05$ ) and FDR ( $<25\%$ ). The positive and negative correlations between FeNO and gene expression levels are indicated by red and green color respectively.

[illegible]
